# Supplementary material for: Understanding the role of social networks in supporting people living with chronic kidney disease. A narrative synthesis
Source: Research Square preprint supplement (doi:10.21203/rs.3.rs-7866009/v1), 2025-10-16
Supplement: Supplementary file 1 [file 0d51b4a842c8be3dbb8bec28.docx]

Supplementary table 1. Table of study characteristics

|  | Participants recruited | PLWCKD or CG or SNM | CKD stage & where recruited from | Type of qualitative research | Location |
| --- | --- | --- | --- | --- | --- |
| Through the Lens of Chronic Kidney Disease: A Qualitative Study of the Experiences of Young Women Living With CKD  Beanlands, Mccay et al. 2020 (43) | n=11  Women 19-38 (median age 34)  55% born in Canada  91% of people included employed at time of study.  ‘Most’ educated beyond high school. | PLWCKD  82% married or in common law relationship.  5 living with spouse and children. | 1-3  Under nephrologist | Focus groups | Urban  Ontario, Canada |
| "Systems seem to get in the way": a qualitative study exploring experiences of accessing and receiving support among informal caregivers of people living with chronic kidney disease  Coumoundouros, Farrand et al. 2024 (46) | n=13  Women 30-69 (mean age 52)  11 White British  2 South Asian.  7 caregivers had a batchelors degree or higher.  7 were in employment. | CG (8 spouse/ partner as PLWCKD) | 6 PLWCKD no on dialysis  3 PLWCKD on dialysis  3 PLWCKD post-transplant  From social media | Semi-structured interviews | UK (12 England, 1 Wales) |
| 'It's the empathy'-defining a role for peer support among people living with chronic kidney disease: a qualitative study  Elliott, Love et al. 2022 (45) | n=51  31 PLWCKD (20 men/ 12 women)  15 CG (12 spouse/ partner) (1 man/ 14 women)  6 peer mentors  All patients and caregivers educated at high school level or above. Majority (45% patients/ 53% caregivers) educated to college/ university level.  Most patients (74%) employed with most caregivers (53%) retired. | PLWCKD  CG  SNM | 13 CKD stage 5 (non-dialysis)  11 CKD stage 4  CKD clinics | Focus groups (n=39)  Semi structured interviews (n=7)  6 peer mentor interviews | Southern Alberta,  Canada |
| Young adults with chronic kidney disease: An exploration of their relationships and support networks  Coyne, Langham et al. 2019 (53) | n=14  18-26 years (mean age 22)  8 men.  No other information described. | PLWCKD | CKD 3-5  CKD clinic | Semi-structured interviews. | 2 UK hospitals |
| The Perspectives of Patients on Health-Care for Co-Morbid Diabetes and Chronic Kidney Disease: A Qualitative Study  Lo, Ilic et al. 2016  (49) | n= 66  PLWCKD = 58  Age 48-84 (median 57)  41% female  CG = 8  Age 48-77 (median 66)  5 men, 3 women  Only participants in semi-structured interviews described.  Only ethnicity described.  5 Caucasian, 2 Asian, 1 south Asian. | PLWCKD  CG | CKD 3-5  39% non-dialysis  19% HD  13% HHD  6% PD  CKD clinic | Focus groups  Semi-structured interviews | 4 tertiary hospitals from 2 large Australian cities. |
| Patients' and kidney care team's perspectives of treatment burden and capacity in older people with chronic kidney disease: a qualitative study  Hounkpatin, Leydon et al. 2020 (47) | n=39  PLWCKD =29  55% men,  45% women  Aged 60-90  97% white  73% married or living with partner  Clinicians =10  90% female, 20% consultant nephrologist  40% renal nurse specialist  20% renal dieticians  10% renal pharmacist  48% secondary school education  27% post secondary school training  25% degree.   - Education not separated between pt and clinicians. | PLWCKD  Clinicians | CKD 3-5  Pre dialysis 100%  38% CKD 3  41 % CKD 4  21 % CKD 5  2 GP surgeries (11 PLWCKD) , 2 CKD clinics (18 PLWCKD) | Semi-structured interviews (PLWCKD)  Focus groups (Clinicians) | UK |
| Treatment Decision Making for Older Kidney Patients during COVID-19  Porteny, Gonzales et al. 2022. (50) | n=76  39 PLWCKD (56% non white) (70-90+) (59% women)  17 CG (40-89) (71% women)  20 Clinicians (85% nephrologists)  Patient- 56% white  33% black  Caregivers 76% white. 24% black.  All patients/ caregivers educated to highschool level. With 28% patients and 35% caregivers educated to post graduate level. | PLWCKD  CG  Clinicians | CKD 4-5  7 on dialysis | Semi-structured interviews | Boston, Portland, San Diego, Chicago.  USA |
| Spirituality, Coping, and Resilience Among Rural Residents Living with Chronic Kidney Disease  Pham, Beastley et al. 2020 (44) | n=80  PLWCKD- 45  CG 15  Religious leader 4  16 people in focus group- unclear of make up    95% high school educated. | PLWCKD  CG  Religious leader | CKD- all stages – Not specified | Semi-structured focus groups (64)  in-depth interviews (16) | Robeson County, North Carolina, US |
| "Maybe They Don't Even Know That I Exist": Challenges Faced by Family Members and Friends of Patients with Advanced Kidney Disease  O’Hare, Szarka et al. 2017 (56) | n=17  23% spouses  65% other relatives  12% friends  77% women  Age 42-81 Mean age 60  35% black, 56% white, 11% other  All PLWCKD veterans | CG  SNM | CKD  44% not on dialysis  37% HD  19% PD | Semi-structured interviews | Puget sound, Washington, USA |
| Cognitive impairment in patients with chronic kidney disease-Next of kin's experiences  Schjerlund, Agnholt et al. 2021 (52) | n=10  50% female  All spouse/ partner  41-77 (mean 66)  70% employed.  20% home dwelling children. | CG | CKD 5 with cognitive impairment  2 Pre dialysis  1 HD  2 HHD  3 PD  2 transplant  CKD clinic | Semi-structured interviews | Denmark |
| Using an international online forum to explore perspectives of caregivers of patients with chronic kidney disease  Tuckey, Duncanson et al. 2022 (51) | n=112  creating 159 posts  48% husband/ male partner  4% wife/ female partner  34% parent | CG | Online internet forum | Qualitative content data analysis | Unclear as could be anywhere |
| Peer support for CKD patients and carers: Overcoming barriers and facilitating access  Taylor, Gutteridge and Willis. 2016 (57) | n=26  15 PLWCKD (8 women, 7 men) (36-77 years old)  11 CG (8 women, 3 men) (52-67 years old)  Caregivers (11) Rural (6) Urban (5) Working (4) Education to GCSE or above (7)  Patients (26) Rural (9) Urban (17) Working (3). Education to GCSE level or above (9). | PLWCKD  CG | CKD 5  3 pre dialysis  2 training for HHD  2 awaiting transplant  11 HHD  4 HD  2 PD  1 transplant  CKD clinic | Interviews | 6 NHS hospital trusts  Rural (15) Urban (11) |
| The self-management experience of patients with type 2 diabetes and chronic kidney disease: A qualitative study  Shirazian, Crnosija et al. 2016 (76) | n= 23  14 men, 9 women.  Age 18-79 (64 mean)  18 participants married  17 white, 5 black, 1 Native-American.  8 had graduate degree. | PLWCKD | CKD 2-5 & T2DM  CKD clinic | Semi-structured focus groups | New York,  USA |
| Supporting People with CKD to Self-Manage  Lightfoot, Wilkinson et al 2025 | n=22  11 men  Age 48-88 years (mean 71)  CKD stage 1-5  20 participants white British  1 Indian  1 Pakistani  7 university level education  4 college level education  6 high school level education | PLWCKD | Recruited from outpatient clinics | Semi-structured interviews | Leicestershire |
